# Supplementary material for: Sorting Nexin 9 facilitates podocin endocytosis in the injured podocyte
Source: PubMed Central journal article supplement (PMC5339724; doi:10.1038/srep43921), 2017-03-07

1 **Sorting Nexin 9 facilitates podocin endocytosis in the injured podocyte**

2

3 Yu Sasaki<sup>1</sup>, Teruo Hidaka<sup>1</sup>, Takashi Ueno<sup>2</sup>, Miyuki Akiba-Takagi<sup>1</sup>, Juan Alejandro Oliva Trejo<sup>1,3</sup>,  
4 Takuto Seki<sup>1,3</sup>, Yoshiko Nagai-Hosoe<sup>1</sup>, Eriko Tanaka<sup>1,4</sup>, Satoshi Horikoshi<sup>1</sup>, Yasuhiko Tomino<sup>1</sup>,  
5 Yusuke Suzuki<sup>1</sup> and Katsuhiko Asanuma<sup>1,3,\*</sup>

6 1 Division of Nephrology, Department of Internal Medicine, Juntendo University Faculty of  
7 Medicine, Tokyo, Japan

8 2 Laboratory of Proteomics and Biomolecular Science, Research Support Center, Juntendo  
9 University Graduate School of Medicine, Tokyo, Japan

10 3 Medical Innovation Center, TMK project, Graduate School of Medicine, Kyoto University,  
11 Kyoto, Japan

12 4 Department of Pediatrics and Developmental Biology, Graduate School of Medicine, Tokyo  
13 Medical and Dental University, Tokyo, Japan

14

15

16 Correspondence: \*Katsuhiko Asanuma MD, PhD

17 Medical Innovation Center, TMK Project, Kyoto University Graduate School of Medicine,

18 53 Shogoin Kawaharacho, Sakyo-ku, Kyoto 606-8507, Japan

19 Tel: +81-75-366-7437

20 E-mail: asanuma@tmk.med.kyoto-u.ac.jp

21

22 Conflicts of Interest Statement:

23 None of the authors has a direct conflict of interest relevant to this study.

24 Beyond the study contents, Katsuhiko Asanuma has received research funding from Mitsubishi  
25 Tanabe Pharmaceutical Corporation.

26

27 **Supplementary figure legends**

28 **Supplementary Figure S1. SNX9 is expressed in human cultured podocytes and glomeruli.**

29 To assess the distribution of SNX9, an antibody was raised against SNX9. Cultured human  
30 podocytes, mouse glomeruli and mouse kidneys were found to express SNX9 to different degrees.  
31 SNX9 was dominantly expressed in differentiated podocytes and glomeruli. Quantifications are  
32 presented as protein expression ratio normalized to  $\beta$ -actin. Mouse testis lysate was used as a  
33 positive control.

Supplementary Figure S1

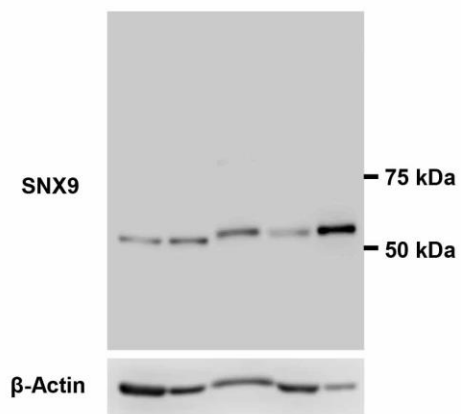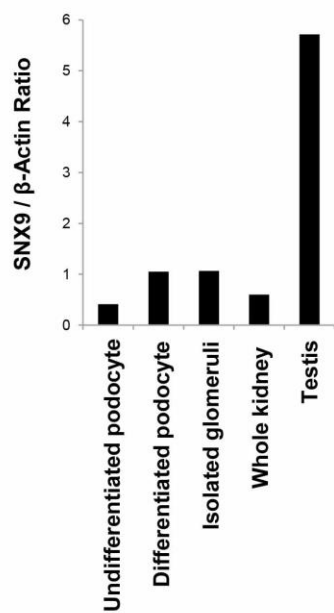

Supplement: srep43921-s1.pdf [file srep43921-s1.pdf]
